# Supplementary material for: Tolerability and efficacy of gamma knife radiosurgery on hepatocellular carcinoma with portal vein tumor thrombosis
Source: PubMed Central journal article supplement (PMC4823131; doi:10.18632/oncotarget.6118), 2015-10-14
Supplement: oncotarget-07-3614-s001.pdf [file oncotarget-07-3614-s001.pdf]

## Tolerability and efficacy of gamma knife radiosurgery on hepatocellular carcinoma with portal vein tumor thrombosis

### Supplementary Material

**Supplementary Table 1: Univariate and multivariate analysis of overall survival in the GKR group by baseline characteristics.**

|                                      |                     | Univariate analysis  |                | Multivariate analysis |                |
|--------------------------------------|---------------------|----------------------|----------------|-----------------------|----------------|
|                                      |                     | mOS (95% CI), months | <i>P</i> value | Hazard ratio (95% CI) | <i>P</i> value |
| All patients in the GKR group (n=64) |                     | 6.1(4.706-7.494)     | -              |                       |                |
| Age                                  | <50 (n=21)          | 6.5(5.154-7.846)     | 0.769          |                       | -              |
|                                      | ≥50 (n=43)          | 5.5(4.108-6.892)     |                |                       | -              |
| Gender                               | male (n=53)         | 5.6(4.304-6.896)     | 0.669          |                       | -              |
|                                      | female (n=11)       | 6.5(3.445-9.555)     |                |                       | -              |
| Etiologies                           | HBV (n=55)          | 6.1(4.145-8.279)     | 0.338          |                       | -              |
|                                      | HCV (n=3)           | 7.1(5.682-9.159)     |                |                       | -              |
|                                      | alcohol(n=5)        | 6.5(5.184-8.156)     |                |                       | -              |
|                                      | others(n=1)         | 4.5                  |                |                       | -              |
| Type of PVTT                         | branch of PV (n=36) | 6.3(3.948-8.652)     | 0.172          | 0.674(0.397-1.14)     | 0.145          |
|                                      | main PV (n=28)      | 5.0(2.666-7.334)     |                |                       | -              |
| Cirrhosis                            | absent (5)          | 7.4(5.127-9.236)     | 0.276          |                       | -              |
|                                      | precent (59)        | 6.0(4.174-8.191)     |                |                       | -              |
| Child-Pugh score                     | A (n=53)            | 6.5(4.870-8.130)     | 0.009          | 0.386(0.196-0.758)    | 0.006          |
|                                      | B7 (n=11)           | 3.0(1.921-4.079)     |                | 1                     | -              |
| ECOG PST                             | 0-1 (n=50)          | 7.1(5.146-8.991)     | 0.015          | 0.412(0.209-0.791)    | 0.014          |
|                                      | 2 (n=14)            | 4.0(2.935-5.011)     |                | 1                     | -              |
| Tumor nodules                        | single (n=34)       | 8.0(5.123-11.014)    | 0.15           | 1                     | -              |
|                                      | multiple (n=30)     | 4.1(3.015-5.373)     |                | 1.231(0.911-1.439)    | 0.092          |
| Largest tumor size                   | ≤5cm (n=11)         | 7.7(4.463-10.937)    | 0.091          | 0.945(0.429-2.084)    | 0.803          |
|                                      | 5-10cm (n=33)       | 6.8(5.679-7.921)     |                | 0.811(0.420-1.564)    | -              |
|                                      | >10cm (n=20)        | 3.1(0.470-5.370)     |                | 1                     | -              |
| Tumor distribution                   | monolobar (n=42)    | 6.3(4.489-8.111)     | 0.315          |                       | -              |
|                                      | bilobar (n=22)      | 5.5(3.344-7.656)     |                |                       | -              |
| AFP                                  | ≤400 ng/ml (n=24)   | 7.9(1.621-16.234)    | 0.012          | 0.477(0.276-0.823)    | 0.008          |
|                                      | >400 ng/ml (n=40)   | 5.2(2.569-7.831)     |                | 1                     | -              |

Median overall survival (mOS) was calculated using the Kaplan-Meier method and compared by the log-rank test. Variables with *P* values < 0.25 on univariate analyses were included in multivariate analysis (Cox proportional hazards model). *P* < 0.05 was considered statistically significant. All statistical analyses were conducted using SPSS 17.0 (SPSS 17.0 for Windows, SPSS, Chicago, III).

GKR: gamma knife radiosurgery; PVTT: portal vein tumor thrombosis; PV: portal vein; HBV:

hepatitis B virus; HCV: hepatitis C virus; ECOG: Eastern Cooperative Oncology Group; PST:  
Performance Status; AFP: alpha fetal protein.
